# Supplementary material
Source: PubMed Central journal article supplement (PMC1323177)

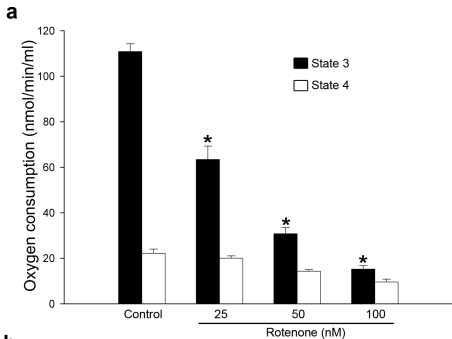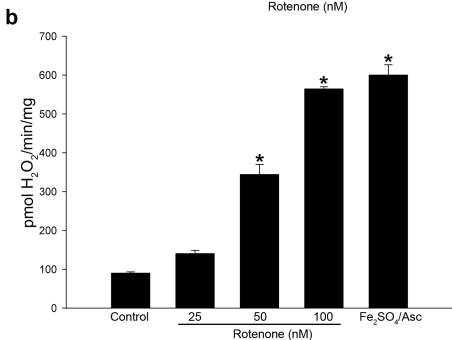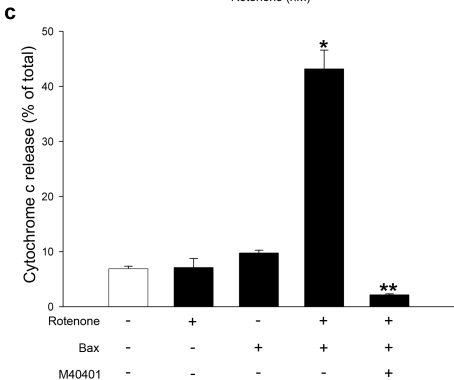

Supplement: pnas_0508215102_2.pdf [file pnas_0508215102_2.pdf]
